# Supplementary material for: Development and Validation of a Stability-Indicating UPLC Method for the Determination of Hexoprenaline in Injectable Dosage Form Using AQbD Principles
Source: MDPI journal article supplement (doi:10.3390/molecules26216597), 2021-10-31
Supplement: s1 [file s1]

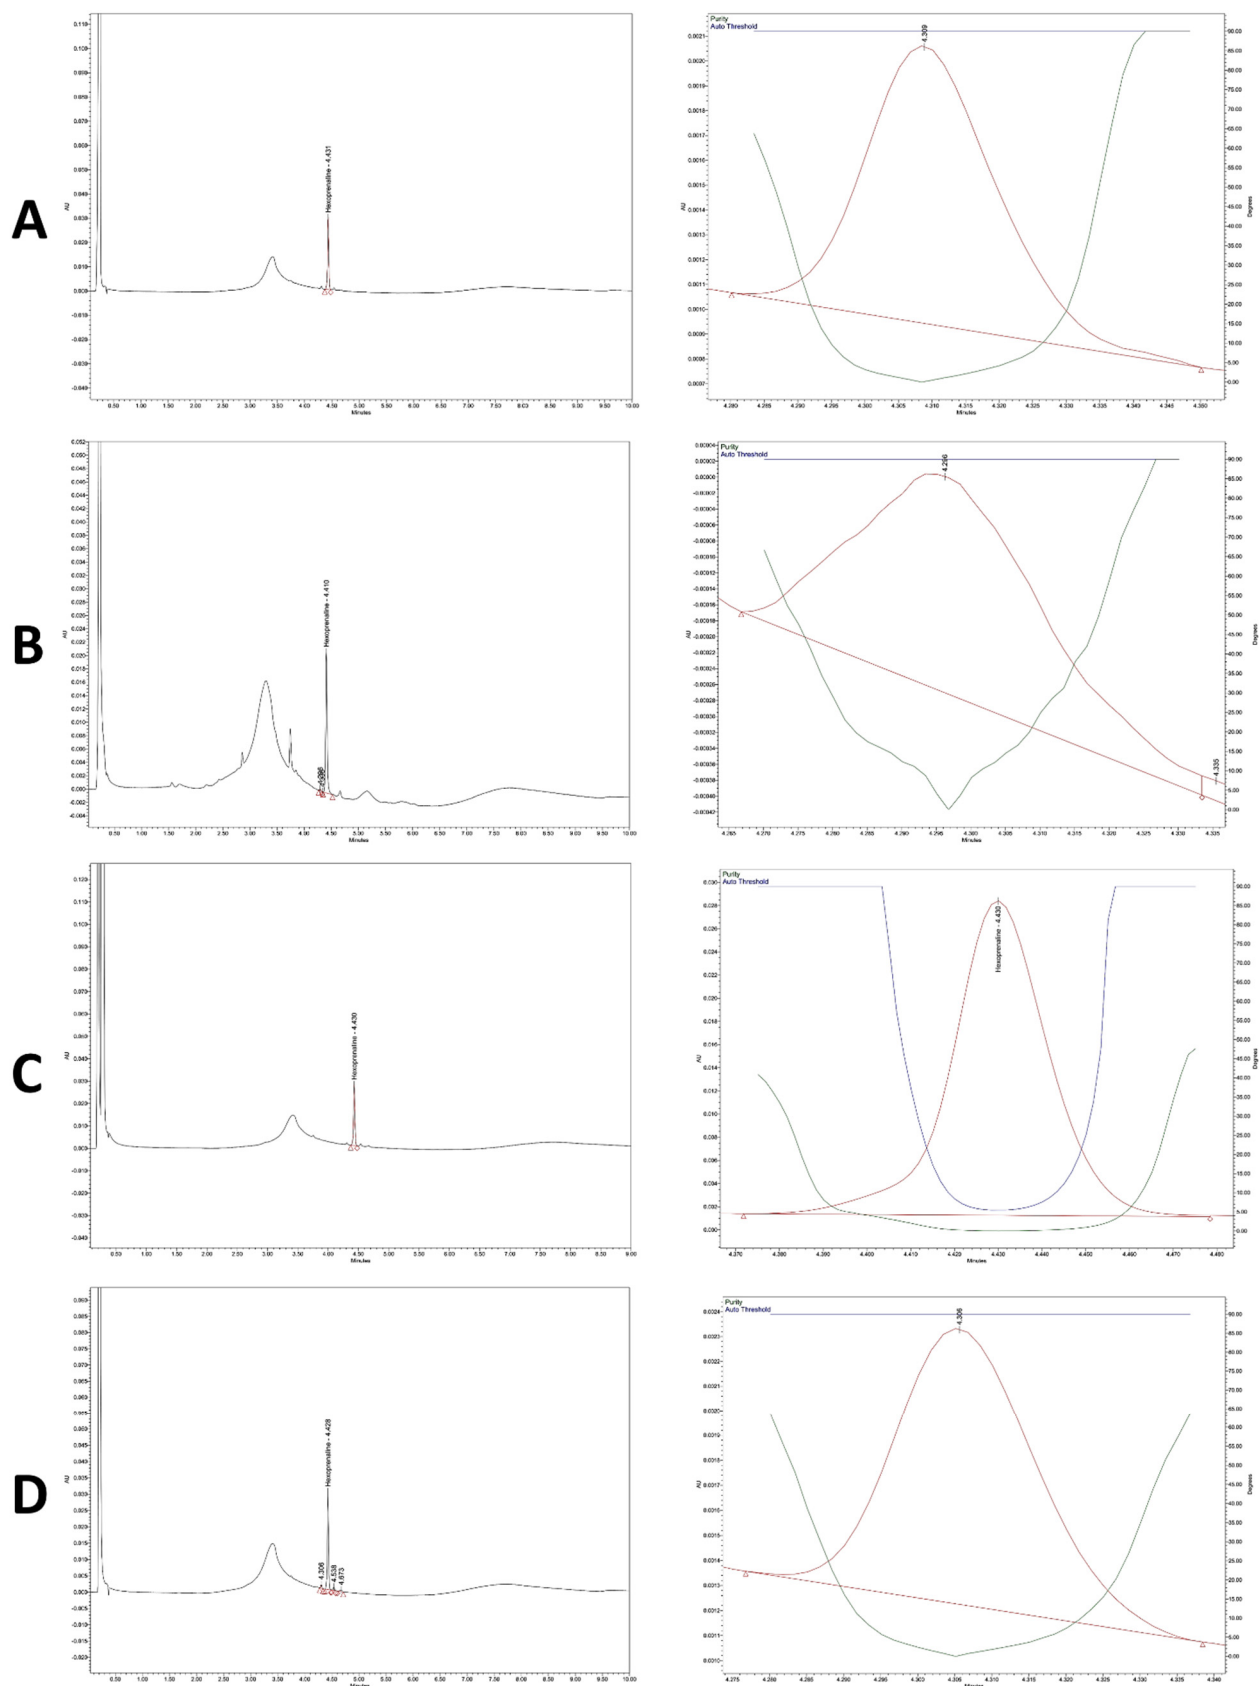

**Figure S1.** Chromatograms and Purity plots of samples exposed to forced degradations acid (A), alkaline (B), oxidative (C) and thermal (D).

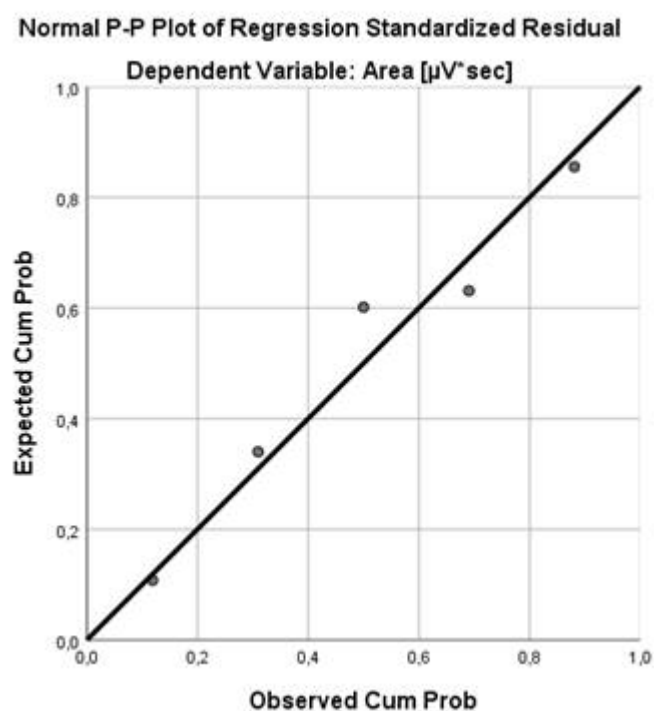

Figure S2. Regression standardized residuals.

Table S1. Evaluation of robustness on system suitability test

| Chromatographic feature | Original conditions | Column variation | Column temperature |            | Flow rate  |            | pH of mobile phase |            | Wavelength |            |
|-------------------------|---------------------|------------------|--------------------|------------|------------|------------|--------------------|------------|------------|------------|
|                         |                     |                  | 20°C               | 30°C       | 0.4 ml/min | 0.6 ml/min | 2.8                | 3.2        | 278 nm     | 282 nm     |
| %RSD (5 inj.)           | 0.2                 | 0.0              | 0.2                | 0.1        | 1.3        | 0.1        | 0.2                | 0.2        | 0.1        | 0.1        |
| Plate count             | 172431              | 196001           | 16801<br>6         | 18181<br>7 | 17215<br>0 | 16608<br>2 | 25649<br>7         | 25712<br>3 | 17673<br>5 | 17667<br>5 |
| Tailing factor          | 1.42                | 1.30             | 1.40               | 1.40       | 1.40       | 1.40       | 1.20               | 1.20       | 1.40       | 1.40       |
| RT                      | 4.38                | 4.33             | 4.39               | 4.37       | 4.71       | 4.14       | 4.36               | 4.38       | 4.38       | 4.38       |
